# Supplementary material
Source: Springer Nature journal article supplement (https://www.springermedizin.de/resource/supplementary/12985_2009_606_MOESM3_ESM.pdf/9608554)

Pre-immune serum

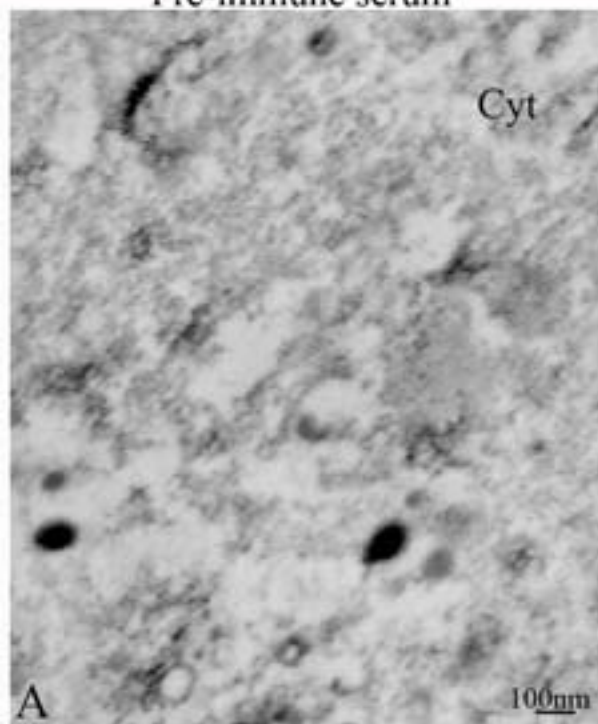

12h p.i.

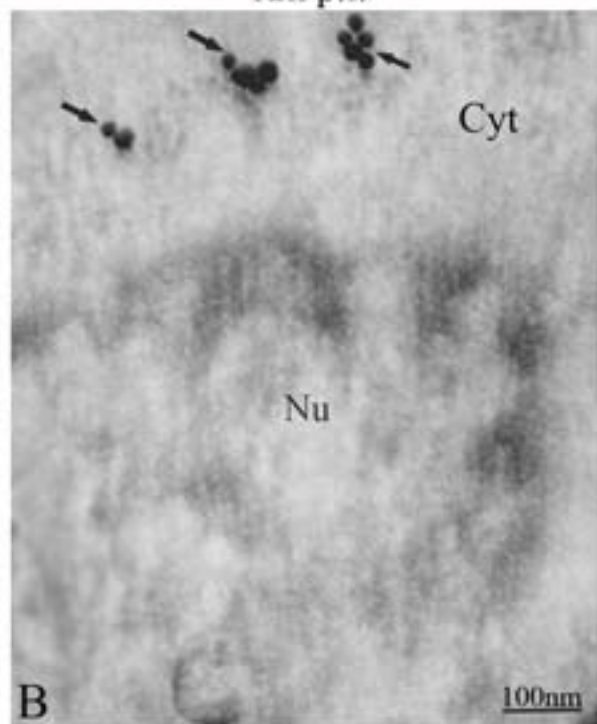

24h p.i.

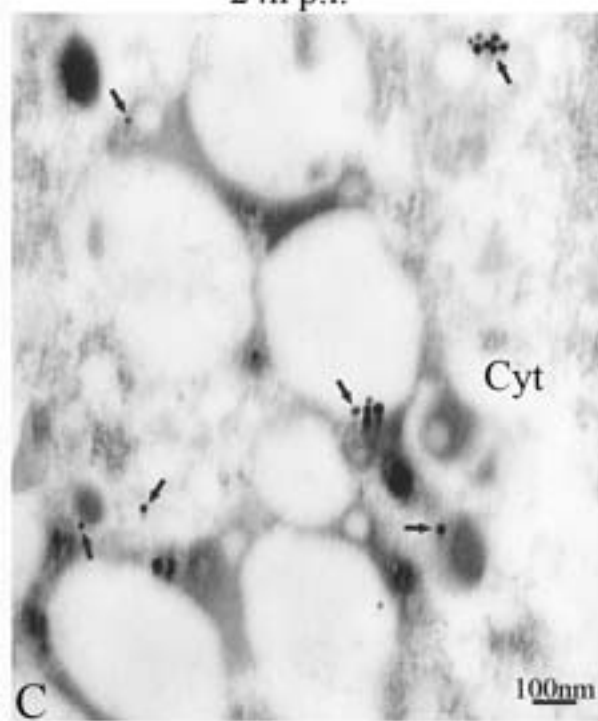

48h p.i.

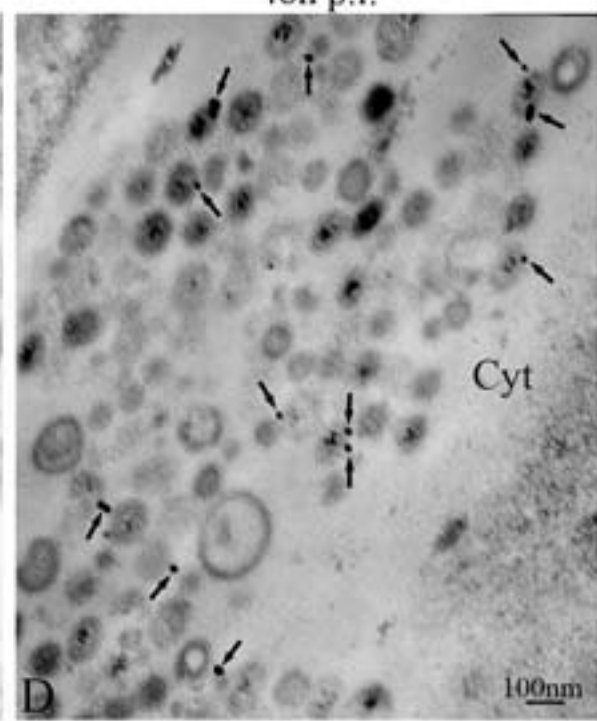

Supplement: MOESM3 [file 9608554]
